# Supplementary material for: Polygenic scores and Mendelian randomization identify plasma proteins causally implicated in Alzheimer’s disease
Source: Front Neurosci. 2024 Jul 23;18:1404377. doi: 10.3389/fnins.2024.1404377 (PMC11300309; doi:10.3389/fnins.2024.1404377)
Supplement: Supplementary file 1 [file Table_1.XLSX]

## Sheet: ST1
Supplementary Table 1. LDSC heritability estimates of plasma protein GWASs
Plasma Protein	h2SNP	Standard Error
Gal-3	0.4363	0.3442
ST2	0.3977	0.3034
GAL	0.2907	0.0925
KIM-1	0.2308	0.1012
PAPPA	0.2261	0.0728
SCF	0.2089	0.0474
OPG	0.2066	0.0627
MPO	0.1982	0.0743
CXCL6	0.1905	0.0906
CCL4	0.1897	0.1545
TM	0.1852	0.0573
SPON1	0.1803	0.1063
TRANCE	0.1784	0.0544
TF	0.1757	0.0555
RAGE	0.1732	0.0306
IL-1ra	0.1616	0.0796
MMP-12	0.1601	0.0636
IL-18	0.1572	0.087
MMP-1	0.1452	0.0663
ITGB1BP2	0.1437	0.0901
HB-EGF	0.1401	0.0355
MMP-3	0.1362	0.0758
TIE2	0.1359	0.0451
CXCL1	0.1355	0.05
CA-125	0.1352	0.125
ESM-1	0.128	0.0594
PTX3	0.126	0.0492
CTSL1	0.1249	0.0287
PRL	0.1235	0.0638
Dkk-1	0.1229	0.0318
PlGF	0.1196	0.0457
MB	0.117	0.027
CXCL16	0.1123	0.0323
REN	0.1103	0.0264
hK11	0.1094	NA
AGRP	0.107	0.03
PDGF_subunit_B	0.1055	0.0259
SELE	0.1048	0.0372
FS	0.1041	0.042
LEP	0.0992	0.0259
MCP-1	0.0988	0.0419
LOX-1	0.0977	0.0321
U-PAR	0.0956	0.0349
FABP4	0.0914	0.0235
RETN	0.0908	0.0463
PAR-1	0.0852	0.0289
CX3CL1	0.0833	0.0299
CCL3	0.0805	0.0263
ADM	0.0801	0.0417
CD40	0.0801	0.0417
SIRT2	0.0795	0.0368
MMP-10	0.0786	0.0631
TNFSF14	0.0783	0.0492
CSTB	0.0776	0.06
IL16	0.0773	0.0251
CTSD	0.0759	0.0388
VEGF-D	0.0746	0.0254
PECAM-1	0.0724	0.0283
CCL20	0.0706	0.0286
TRAIL	0.0706	0.0304
ECP	0.0704	0.0652
IL-27	0.0696	0.0568
FGF-23	0.0691	0.027
mAmP	0.0689	0.1214
TNF-R1	0.0673	0.0224
HGF	0.0666	0.0261
TNF-R2	0.0656	0.0248
KLK6	0.064	0.0298
GH	0.063	0.0238
t-PA	0.0615	0.0238
IL-6RA	0.0607	0.0539
NEMO	0.0603	0.0235
CHI3L1	0.0592	0.0261
PSGL-1	0.055	0.0301
HSP_27	0.054	0.0453
MMP-7	0.0524	0.0258
BNGF	0.0479	0.0414
CSF_1	0.0478	0.027
CD40_L	0.0471	0.0251
GDF_15	0.042	0.0242
TRAIL_R2	0.0349	0.0361
EN_RAGE	0.0326	0.0459
IL_8	0.0326	0.0278
SRC	0.0272	0.0249
FAS	0.0184	NA
NT_pro_BNP	0.0159	NA
CASP_8	0.0151	0.0408
IL_6	0.0082	NA
EGF	-0.0096	0.0511
VEGF_A	-0.0142	0.0733

## Sheet: ST2
Supplementary Table 2. Plasma protein PGS meta-analysis summary estimates
Trait	BETA	SE	P	Study	FDR	OR	LCI	UCI
CX3CL1	-0.131146	0.034655	0.000154122	RE Summary	0.000308245	0.87709	0.809166	0.945013
HGF	0.130541	0.031498	3.40686e-05	RE Summary	0.000136274	1.13944	1.07771	1.20118
MMP-3	-0.0974516	0.0314635	0.00195302	RE Summary	0.00195302	0.907146	0.845478	0.968815
TIE2	0.10287	0.0323511	0.00147381	RE Summary	0.00195302	1.10835	1.04494	1.17176

## Sheet: ST3
Supplementary Table 3. Plasma Protein Exposures MR Analysis with Strict Clumping
id.exposure	id.outcome	method	nsnp	b	se	pval	SNPs	OR	LCI	UCI
CX3CL1	AD_Clinical	MR Egger	6	0.00591174	0.143334	0.969078	Genome-Wide	1.00593	0.724995	1.28686
CX3CL1	AD_Clinical	Weighted median	6	-0.0148724	0.0626385	0.812322	Genome-Wide	0.985238	0.862466	1.10801
CX3CL1	AD_Clinical	FE IVW	6	-0.0174817	0.0561238	0.755433	Genome-Wide	0.98267	0.872668	1.09267
CX3CL1	AD_Clinical	RE IVW	6	-0.0174817	0.0322614	0.587904	Genome-Wide	0.98267	0.919438	1.0459
MMP3	AD_Clinical	MR Egger	7	-0.0298569	0.077991	0.717584	Genome-Wide	0.970584	0.817722	1.12345
MMP3	AD_Clinical	Weighted median	7	0.00618215	0.0453388	0.891541	Genome-Wide	1.0062	0.917337	1.09507
MMP3	AD_Clinical	FE IVW	7	-0.00418001	0.0410707	0.918935	Genome-Wide	0.995829	0.91533	1.07633
MMP3	AD_Clinical	RE IVW	7	-0.00418001	0.0410707	0.918935	Genome-Wide	0.995829	0.91533	1.07633
TIE2	AD_Clinical	MR Egger	7	0.0283124	0.0395034	0.505628	Genome-Wide	1.02872	0.95129	1.10614
TIE2	AD_Clinical	Weighted median	7	0.0486086	0.0359878	0.176792	Genome-Wide	1.04981	0.979273	1.12035
TIE2	AD_Clinical	FE IVW	7	0.0357054	0.0292601	0.22236	Genome-Wide	1.03635	0.979001	1.0937
TIE2	AD_Clinical	RE IVW	7	0.0357054	0.0150599	0.0177456	Genome-Wide	1.03635	1.00683	1.06587
HGF	AD_Clinical	FE IVW	2	-0.056523	0.0932689	0.5445	Genome-Wide	0.945045	0.762238	1.12785
HGF	AD_Clinical	RE IVW	2	-0.056523	0.0199167	0.00454014	Genome-Wide	0.945045	0.906008	0.984081
CX3CL1	AD_Clinical	FE IVW	2	-0.0203986	0.0696836	0.769728	Cis	0.979808	0.843228	1.11639
CX3CL1	AD_Clinical	RE IVW	2	-0.0203986	0.0288104	0.478928	Cis	0.979808	0.92334	1.03628
MMP3	AD_Clinical	MR Egger	5	-0.281725	0.205846	0.264597	Cis	0.754481	0.351023	1.15794
MMP3	AD_Clinical	Weighted median	5	0.0141428	0.0454888	0.755871	Cis	1.01424	0.925085	1.1034
MMP3	AD_Clinical	FE IVW	5	-0.0042257	0.0510224	0.933994	Cis	0.995783	0.895779	1.09579
MMP3	AD_Clinical	RE IVW	5	-0.0042257	0.0510224	0.933994	Cis	0.995783	0.895779	1.09579
TIE2	AD_Clinical	MR Egger	3	0.0283715	0.0539415	0.691745	Cis	1.02878	0.923052	1.1345				as
TIE2	AD_Clinical	Weighted median	3	0.0352255	0.0337787	0.297026	Cis	1.03585	0.969647	1.10206
TIE2	AD_Clinical	FE IVW	3	0.0341484	0.0311982	0.273707	Cis	1.03474	0.97359	1.09589
TIE2	AD_Clinical	RE IVW	3	0.0341484	0.0246841	0.166537	Cis	1.03474	0.986357	1.08312
HGF	AD_Clinical	Wald ratio	1	-0.0789211	0.14036	0.573927	Cis	0.924113	0.649008	1.19922

## Sheet: ST4
Supplementary Table 4. Plasma Protein Exposures MR Analysis with PGS-Style Clumping
id.exposure	id.outcome	method	nsnp	b	se	pval	SNPs	OR	LCI	UCI
CX3CL1	AD_Clinical	MR Egger	6	0.00591174	0.143334	0.969078	Genome-Wide	1.00593	0.724995	1.28686
CX3CL1	AD_Clinical	Weighted median	6	-0.0148724	0.0634143	0.814575	Genome-Wide	0.985238	0.860946	1.10953
CX3CL1	AD_Clinical	FE IVW	6	-0.0174817	0.0561238	0.755433	Genome-Wide	0.98267	0.872668	1.09267
CX3CL1	AD_Clinical	RE IVW	6	-0.0174817	0.0322614	0.587904	Genome-Wide	0.98267	0.919438	1.0459
MMP3	AD_Clinical	MR Egger	52	-0.0111337	0.0351114	0.752491	Genome-Wide	0.988928	0.92011	1.05775
MMP3	AD_Clinical	Weighted median	52	0.00698392	0.0278394	0.801919	Genome-Wide	1.00701	0.952443	1.06157
MMP3	AD_Clinical	FE IVW	52	-0.00533006	0.0181866	0.769464	Genome-Wide	0.994684	0.959038	1.03033
MMP3	AD_Clinical	RE IVW	52	-0.00533006	0.0174239	0.759677	Genome-Wide	0.994684	0.960533	1.02883
TIE2	AD_Clinical	MR Egger	69	0.00556286	0.0296657	0.851821	Genome-Wide	1.00558	0.947433	1.06372
TIE2	AD_Clinical	Weighted median	69	-0.00838404	0.0282178	0.766376	Genome-Wide	0.991651	0.936344	1.04696
TIE2	AD_Clinical	FE IVW	69	-0.0128467	0.0181247	0.47845	Genome-Wide	0.987235	0.951711	1.02276
TIE2	AD_Clinical	RE IVW	69	-0.0128467	0.0181247	0.47845	Genome-Wide	0.987235	0.951711	1.02276
HGF	AD_Clinical	MR Egger	7	0.0276307	0.17975	0.883844	Genome-Wide	1.02802	0.675706	1.38033
HGF	AD_Clinical	Weighted median	7	-0.058577	0.071661	0.41369	Genome-Wide	0.943106	0.80265	1.08356
HGF	AD_Clinical	FE IVW	7	-0.0713636	0.0603749	0.237203	Genome-Wide	0.931123	0.812788	1.04946
HGF	AD_Clinical	RE IVW	7	-0.0713636	0.0221752	0.00129007	Genome-Wide	0.931123	0.88766	0.974587
CX3CL1	AD_Clinical	MR Egger	10	0.00639872	0.118039	0.958098	Cis	1.00642	0.775063	1.23778
CX3CL1	AD_Clinical	Weighted median	10	-0.0355682	0.0593828	0.549197	Cis	0.965057	0.848667	1.08145
CX3CL1	AD_Clinical	FE IVW	10	-0.0237005	0.0449358	0.597895	Cis	0.976578	0.888504	1.06465
CX3CL1	AD_Clinical	RE IVW	10	-0.0237005	0.0290846	0.41514	Cis	0.976578	0.919572	1.03358
MMP3	AD_Clinical	MR Egger	50	-0.0120166	0.0369089	0.74616	Cis	0.988055	0.915714	1.0604
MMP3	AD_Clinical	Weighted median	50	0.00677381	0.0284824	0.812017	Cis	1.0068	0.950971	1.06262
MMP3	AD_Clinical	FE IVW	50	-0.00534941	0.0182637	0.7696	Cis	0.994665	0.958868	1.03046
MMP3	AD_Clinical	RE IVW	50	-0.00534941	0.0178372	0.764252	Cis	0.994665	0.959704	1.02963
TIE2	AD_Clinical	MR Egger	45	0.00315267	0.0302874	0.917581	Cis	1.00316	0.943794	1.06252
TIE2	AD_Clinical	Weighted median	45	-0.00211877	0.0291872	0.94213	Cis	0.997883	0.940677	1.05509
TIE2	AD_Clinical	FE IVW	45	-0.00206906	0.0194172	0.91514	Cis	0.997933	0.959875	1.03599
TIE2	AD_Clinical	RE IVW	45	-0.00206906	0.0194172	0.91514	Cis	0.997933	0.959875	1.03599
HGF	AD_Clinical	MR Egger	3	-0.0328577	0.246341	0.915584	Cis	0.967676	0.484849	1.4505
HGF	AD_Clinical	Weighted median	3	-0.11221	0.107517	0.29665	Cis	0.893857	0.683123	1.10459
HGF	AD_Clinical	FE IVW	3	-0.112421	0.0960713	0.241927	Cis	0.893668	0.705368	1.08197
HGF	AD_Clinical	RE IVW	3	-0.112421	0.0238345	2.39655e-06	Cis	0.893668	0.846952	0.940383

## Sheet: ST5
Supplementary Table 5: LOAD Exposure MR Analyses
id.exposure	id.outcome	method	nsnp	b	se	pval	Clumping	OR	LCI	UCI
AD_Clinical	CX3CL1	MR Egger	16	-0.00757615	0.0221811	0.737756	Strict	0.992452	0.948977	1.03593
AD_Clinical	CX3CL1	Weighted median	16	-0.00369352	0.0208211	0.8592	Strict	0.996313	0.955504	1.03712
AD_Clinical	CX3CL1	FE IVW	16	0.00799836	0.0161325	0.620041	Strict	1.00803	0.976411	1.03965
AD_Clinical	CX3CL1	RE IVW	16	0.00799836	0.0155126	0.60613	Strict	1.00803	0.977626	1.03844
AD_Clinical	MMP3	MR Egger	16	0.0203567	0.0255258	0.43848	Strict	1.02057	0.970535	1.0706
AD_Clinical	MMP3	Weighted median	16	0.00760654	0.0196446	0.698602	Strict	1.00764	0.969132	1.04614
AD_Clinical	MMP3	FE IVW	16	0.00913104	0.0177565	0.607086	Strict	1.00917	0.97437	1.04398
AD_Clinical	MMP3	RE IVW	16	0.00913104	0.0177565	0.607086	Strict	1.00917	0.97437	1.04398
AD_Clinical	TIE2	MR Egger	16	-0.0202789	0.033719	0.557182	Strict	0.979925	0.913836	1.04601
AD_Clinical	TIE2	Weighted median	16	-0.0017947	0.0201987	0.9292	Strict	0.998207	0.958617	1.0378
AD_Clinical	TIE2	FE IVW	16	0.00675854	0.0248405	0.785563	Strict	1.00678	0.958094	1.05547
AD_Clinical	TIE2	RE IVW	16	0.00675854	0.0248405	0.785563	Strict	1.00678	0.958094	1.05547
AD_Clinical	HGF	MR Egger	16	-0.0288909	0.02223	0.21472	Strict	0.971522	0.927952	1.01509
AD_Clinical	HGF	Weighted median	16	-0.00994163	0.0216868	0.646651	Strict	0.990108	0.947602	1.03261
AD_Clinical	HGF	FE IVW	16	-0.00795839	0.0161667	0.622529	Strict	0.992073	0.960386	1.02376
AD_Clinical	HGF	RE IVW	16	-0.00795839	0.0128434	0.535491	Strict	0.992073	0.9669	1.01725
AD_Clinical	CX3CL1	MR Egger	58	-0.0173662	0.0156304	0.271292	PGS	0.982784	0.952148	1.01342
AD_Clinical	CX3CL1	Weighted median	58	-0.0133674	0.0138469	0.334358	PGS	0.986722	0.959582	1.01386
AD_Clinical	CX3CL1	FE IVW	58	-0.00141882	0.00902165	0.875033	PGS	0.998582	0.9809	1.01626
AD_Clinical	CX3CL1	RE IVW	58	-0.00141882	0.00800655	0.859346	PGS	0.998582	0.982889	1.01428
AD_Clinical	MMP3	MR Egger	58	0.0219315	0.0146922	0.141121	PGS	1.02217	0.993377	1.05097
AD_Clinical	MMP3	Weighted median	58	0.00704561	0.0112475	0.531042	PGS	1.00707	0.985025	1.02912
AD_Clinical	MMP3	FE IVW	58	0.0120515	0.00826678	0.14489	PGS	1.01212	0.995922	1.02833
AD_Clinical	MMP3	RE IVW	58	0.0120515	0.00826678	0.14489	PGS	1.01212	0.995922	1.02833
AD_Clinical	TIE2	MR Egger	58	-0.0268105	0.0162813	0.10522	PGS	0.973546	0.941634	1.00546
AD_Clinical	TIE2	Weighted median	58	-0.0125831	0.0124989	0.31406	PGS	0.987496	0.962998	1.01199
AD_Clinical	TIE2	FE IVW	58	-0.00594449	0.00955374	0.5338	PGS	0.994073	0.975348	1.0128
AD_Clinical	TIE2	RE IVW	58	-0.00594449	0.00955374	0.5338	PGS	0.994073	0.975348	1.0128
AD_Clinical	HGF	MR Egger	58	-0.0504016	0.015684	0.00217608	PGS	0.950847	0.920107	0.981588
AD_Clinical	HGF	Weighted median	58	-0.0153825	0.0136442	0.259574	PGS	0.984735	0.957992	1.01148
AD_Clinical	HGF	FE IVW	58	-0.0305957	0.00904688	0.000719836	PGS	0.969868	0.952136	0.987599
AD_Clinical	HGF	RE IVW	58	-0.0305957	0.00702422	1.32612e-05	PGS	0.969868	0.9561	0.983635
